# Supplementary material
Source: publisher figshare collection journal article supplement (https://rs.figshare.com/ndownloader/files/12394940)
Supplement: Supplementary file [file 12394940]

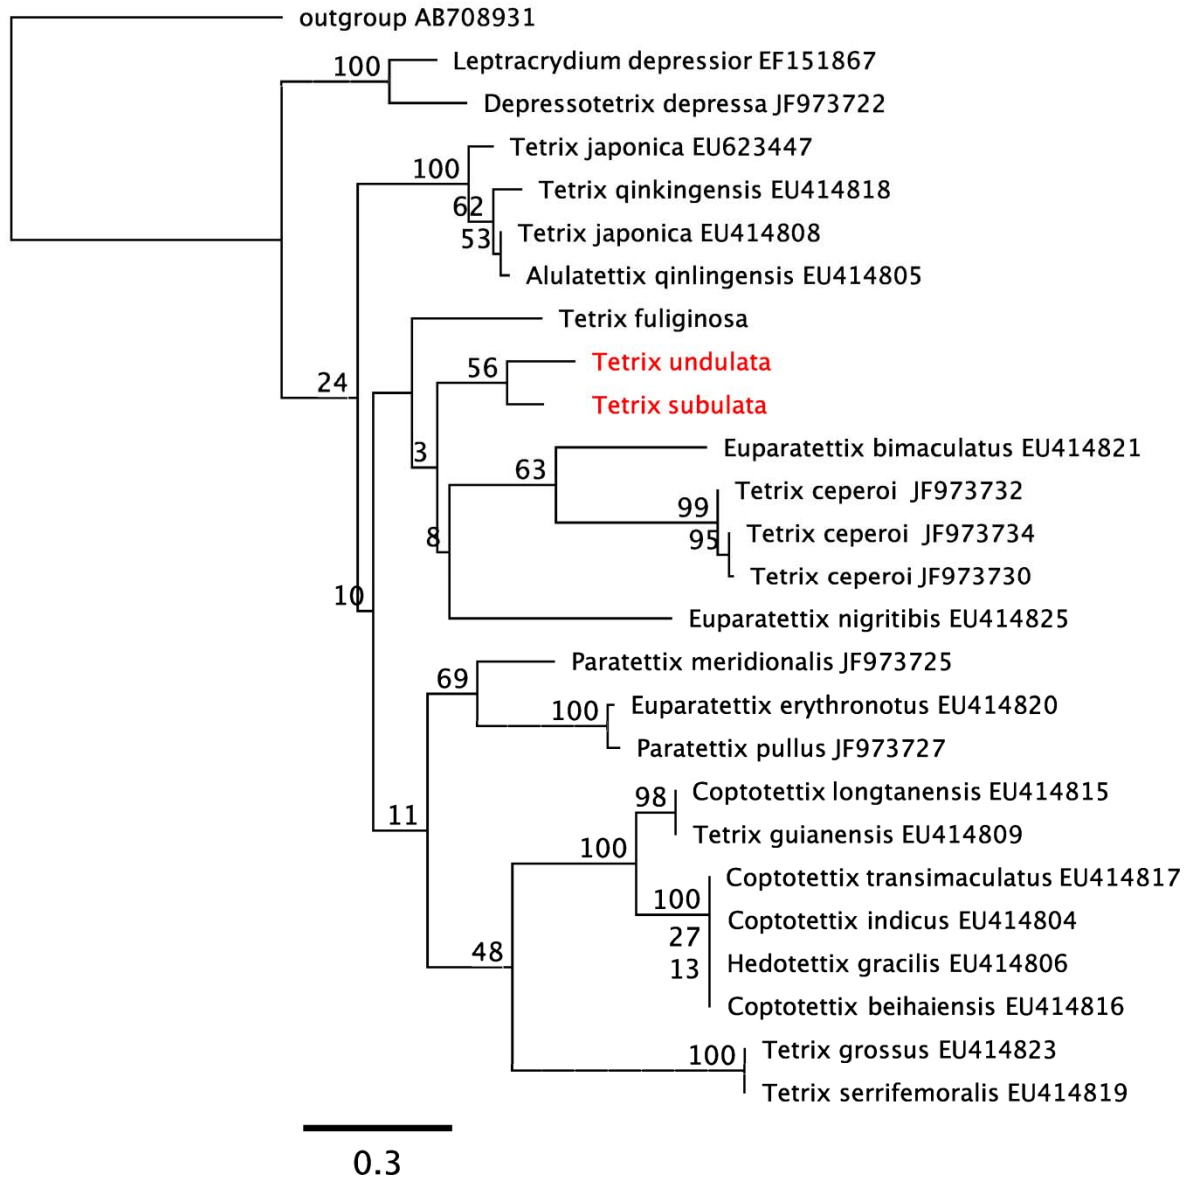

**Figure S1.** Maximum-Likelihood tree (GTR+I model of evolutionary changes) of species selected to provide a broad phylogenetic and geographic coverage of pygmy grasshoppers. Numbers of the branches represent bootstrap values based on 100 iterations. The phylogeny is based on 285bp of the cytochrome oxidase I (COI) mtDNA gene. Reference sequences were obtained from GenBank with the accession numbers shown after the name in the phylogeny. *Tetrix undulata* and *T. subulata* represent sister taxa, but although grouping together in the phylogeny the genetic distance is rather high (p-distance: 7.4% based on the full 396bp). Analyses were performed by Olof Hellgren.
